# Health Newscasts for Increasing Influenza Vaccination Coverage: An Inductive Reasoning Game Approach

Romulus Breban\*

Unité d'Epidémiologie des Maladies Emergentes, Institut Pasteur, Paris, France

## Abstract

Both pandemic and seasonal influenza are receiving more attention from mass media than ever before. Topics such as epidemic severity and vaccination are changing the way in which we perceive the utility of disease prevention. Voluntary influenza vaccination has been recently modeled using inductive reasoning games. It has thus been found that severe epidemics may occur because individuals do not vaccinate and, instead, attempt to benefit from the immunity of their peers. Such epidemics could be prevented by voluntary vaccination if incentives were offered. However, a key assumption has been that individuals make vaccination decisions based on whether there was an epidemic each influenza season; no other epidemiological information is available to them. In this work, we relax this assumption and investigate the consequences of making more informed vaccination decisions while no incentives are offered. We obtain three major results. First, individuals will not cooperate enough to constantly prevent influenza epidemics through voluntary vaccination no matter how much they learned about influenza epidemiology. Second, broadcasting epidemiological information richer than whether an epidemic occurred may stabilize the vaccination coverage and suppress severe influenza epidemics. Third, the stable vaccination coverage follows the trend of the perceived benefit of vaccination. However, increasing the amount of epidemiological information released to the public may either increase or decrease the perceived benefit of vaccination. We discuss three scenarios where individuals know, in addition to whether there was an epidemic, (i) the incidence, (ii) the vaccination coverage and (iii) both the incidence and the vaccination coverage, every influenza season. We show that broadcasting both the incidence and the vaccination coverage could yield either better or worse vaccination coverage than broadcasting each piece of information on its own.

**Citation:** Breban R (2011) Health Newscasts for Increasing Influenza Vaccination Coverage: An Inductive Reasoning Game Approach. PLoS ONE 6(12): e28300. doi:10.1371/journal.pone.0028300

**Editor:** Attila Szolnoki, Hungarian Academy of Sciences, Hungary

**Received:** June 28, 2011; **Accepted:** November 5, 2011; **Published:** December 21, 2011

**Copyright:** © 2011 Romulus Breban. This is an open-access article distributed under the terms of the Creative Commons Attribution License, which permits unrestricted use, distribution, and reproduction in any medium, provided the original author and source are credited.

**Funding:** The author has no support or funding to report.

**Competing Interests:** The author has declared that no competing interests exist.

\* E-mail: romulus.breban@pasteur.fr

## Introduction

The increasing mediatization of medical and epidemiological information determines an increasing role of social behavior for the success of routine vaccination programs. Vaccine promotions, epidemiological newscasts and rumors change the way in which individuals perceive the utility of disease prevention. This phenomenon has been described by empirical studies discussing vaccination against human papillomavirus [1], measles-mumps-rubella [2,3], poliomyelitis [4] and influenza [5,6]. Social behavior is particularly important for influenza, which is a seasonal disease and remains a continual epidemic and pandemic threat. In this case, individuals need to make yearly vaccination decisions that are all potentially biased by their perception of costs versus benefits of vaccination.

Mathematical modeling of the potential impact of mass media on the course of epidemics has become a topic of interest only in the past few years [7–10]. Several problems have been discussed: sequential disease outbreaks due to the psychological impact of the reported incidence [7], coexistence of multiple endemic states caused by media coverage [8], and the effect of mass media on constant and seasonal vaccination programs [9,10]. The mathematical techniques utilized so far are compartmental models expressed as systems of ordinary differential equations. However, a

technique more adapted to describe decision making and adaptability of individuals in the process of voluntary vaccination is game theory.

Game theory has been successfully applied to modeling the impact of social behavior on vaccination coverage (i.e., the proportion of the population that gets vaccinated). Deductive reasoning games have been used to predict the voluntary vaccination coverage for pathogens that provide permanent immunity [11–13]. In the case of pathogens that do not provide permanent immunity (e.g., influenza), several modeling ideas have been studied. An evolutionary game was proposed where an individual copies the vaccination strategy of another with a probability depending on the success of the vaccination strategy [14]. A different approach is that based on inductive reasoning games [15] initially applied to modeling financial markets [16]. In this case, it is conjectured that individuals make repeated vaccination decisions based on their expectations about future epidemics that are, in turn, determined by their collective vaccination coverage. Inductive reasoning games were applied to understanding the dynamics of influenza vaccination coverage assuming both uniform mixing of individuals [17,18] and mixing through complex contact networks [19].

In this paper, we generalize previous modeling work [17,18] to study the potential impact of mass media on social behavior and,

implicitly, influenza vaccination coverage. So far, inductive reasoning games of influenza vaccination assumed that, at the end of each influenza season, the only epidemiological information available to individuals was whether an epidemic took place. One of the main outcomes of the models with uniform mixing is that influenza epidemics gradually decrease in severity and are occasionally prevented [17]. These models then predict the occurrence of a severe epidemic because individuals expect that their peers will vaccinate and they attempt to free-ride on herd immunity. After the severe epidemic, individuals vaccinate again in increasing numbers, year after year, until an epidemic is prevented and the scenario repeats. Various vaccination incentives were theoretically investigated for their efficiency in preventing severe epidemics [17]. Here we investigate the potential impact of broadcasting various epidemiological information for individuals to evaluate their influenza vaccination decisions at the end of the season. We analyze how epidemiological newscasts may influence the perceived benefit of vaccination, change social behavior, and prevent severe epidemics.

The outline of the paper is as follows. In the next section we introduce our generalized individual-level inductive reasoning game by a set of eight assumptions. It turns out that, in the case of large populations, the mean-field approximation of the game typically provides an adequate description of the coverage dynamics. Hence, a full analysis of the inductive reasoning game is not typically necessary. Then, we develop this approximation in the form of a one-dimensional map where influenza epidemiology and social behavior remain broadly specified by a few unrestricted axioms. Analysis of this iterated map leads to three key results: (a) individuals will not cooperate enough to consistently prevent influenza epidemics; (b) broadcasting epidemiological information in addition to whether or not an epidemic occurred may stabilize the vaccination coverage and prevent severe epidemics; and (c) the stable vaccination coverage follows the trend of the perceived benefit of vaccination. However, increasing the amount of epidemiological information released to the public may either increase or decrease the perceived benefit of vaccination. To see these results at work, we analyze several model examples. First, we discuss a slight generalization of a previously published model displaying periodically recurring severe epidemics [17,18] that serves as reference. Then, we discuss two models where individuals know, every influenza season, either (i) the incidence or (ii) the vaccination coverage, in addition to whether there was an epidemic. We show that broadcasting either epidemiological indicator may stabilize the vaccination coverage and prevent severe epidemics. Finally, we discuss two models where individuals know both the incidence and the vaccination coverage every influenza season. One model assumes that individuals are risk-avoiding and use the available information to better protect themselves against infection, while the other assumes that individuals are risk-seeking and use the information to take even greater risk in the attempt to free-ride on herd immunity. We show that broadcasting both the incidence and the vaccination coverage could yield either better or worse vaccination coverage than broadcasting each piece of information on its own. We make concrete assumptions about influenza epidemiology and present numerical results. Finally, we conclude our work.

## Methods

Our model describes a large population of individuals. We account only for the occurrence of epidemics and we do not consider outbreaks since outbreaks become decreasingly important

as the population size increases. Influenza transmission models describing large populations [20–22] have demonstrated the existence of a *critical coverage level* such that: if the coverage is below the critical level, an epidemic will occur, otherwise the epidemic will be prevented. Our inductive reasoning game includes a simple model of this coverage threshold (see Assumptions q1–2 below), assumes that the vaccine offers complete protection for one year (n.b., increasing the critical vaccination coverage may account for effects of treatment and imperfect vaccines), and proceeds as follows. We consider a large population of individuals acting in their own self-interest. Each individual makes personal decisions as to whether or not get vaccinated against influenza. The collective outcome of these decisions drives influenza epidemiology which, in turn, affects future individual-level decisions. The model proceeds iteratively in two steps per influenza season. The first step is at the beginning of the season when every individual makes their vaccination decision depending on their experience with flu vaccination. An epidemic may occur every influenza season, depending on how the achieved coverage compares with the critical coverage. The second step is at the end of the influenza season when every individual scores their last vaccination decision. We assume that, if they did not get vaccinated, an individual evaluates their decision favorably if they avoided infection (the score has the maximum value of 1) and unfavorably if they got infected (the score has the minimum value of 0). Vaccinated individuals establish the scores of their decisions based on the available epidemiological information. Then, each individual updates their vaccination experience using the score of their last vaccination decision. The whole process repeats in the next influenza season.

## Model definition

For an axiomatic description of the model, we denote the coverage by  $p$ , the critical coverage by  $\pi_c$ , and the probability of getting infected by  $q$ . We now present the assumptions that define our generalized inductive reasoning game in mathematical form.

**Assumption 1.** We consider a number of  $N$  individuals that make yearly vaccination decisions. The interest of the individuals is to avoid getting infected, preferably without having to vaccinate. They act in their own interest and do not communicate their vaccination decisions to each other.

**Assumption 2.** To make their vaccination decision, each individual uses their past experience of vaccination outcomes. Thus, individuals independently decide whether or not to vaccinate using inductive reasoning.

**Assumption 3.** An individual weights their previous vaccination outcomes with respect to their most recent vaccination outcome. A parameter  $s$  discounts the previous year's vaccination outcome with respect to the outcome of the present year ( $0 \leq s < 1$ ). For  $s = 0$ , individuals completely ignore the outcome of previous seasons and, as a consequence, do not use inductive reasoning. If  $s$  were equal to 1, individuals would not discount the previous vaccination seasons; therefore, the vaccination outcome of the present season (i.e., season  $n$ ) would be as important as any of the previous seasons.

**Assumption 4.** We define a vaccination decision as a realization  $x_n^{(i)}$  of a Bernoulli variable with parameter  $w_n^{(i)}$  that further depends on a variable  $v_n^{(i)}$ .  $i$  and  $n$  are positive integers;  $i = 1, 2, \dots, N$  labels the individual and  $n \geq 0$  labels the season. If individual  $i$  decides to get vaccinated in season  $n$  then  $x_n^{(i)} = 1$ , otherwise  $x_n^{(i)} = 0$ .  $w_n^{(i)}$  is the probability that individual  $i$  vaccinates in season  $n$ . The variable  $v_n^{(i)}$  characterizes the *pro-vaccination experience* of the  $i$ th individual (see details in Assumption 7) and

determines  $w_n^{(i)}$ . The domains of the variables are as follows:  $x_n^{(i)} \in \{0, 1\}$ ,  $w_n^{(i)} \in [0, 1]$ , and  $v_n^{(i)} \in [0, 1/(1-s)]$ .

**Assumption 5.** In year  $n$ , a set of  $N$  vaccination decisions is made  $\{x_n^{(i)}; 1 \leq i \leq N\}$  that, together with the pro-vaccination experiences in year  $n$ , determine the pro-vaccination experiences of all individuals in year  $(n+1)$ ,  $\{v_{n+1}^{(i)}; 1 \leq i \leq N\}$ , which further determine  $\{w_{n+1}^{(i)}; 1 \leq i \leq N\}$ , the parameters of the Bernoulli variables in year  $(n+1)$ . Then, the set of vaccination decisions in year  $(n+1)$  is obtained  $\{x_{n+1}^{(i)}; 1 \leq i \leq N\}$ . Our inductive reasoning game is an array of sets of vaccination decisions.

**Assumption 6.** The infection event of individual  $i$  in year  $n$  is described by a variable  $z_n^{(i)}$ . (If individual  $i$  got infected in season  $n$  then  $z_n^{(i)} = 1$ , otherwise  $z_n^{(i)} = 0$ .) The infection process is as follows. If  $x_n^{(i)} = 1$  then  $z_n^{(i)} = 0$ . If  $x_n^{(i)} = 0$ , then  $z_n^{(i)}$  is a realization of a Bernoulli variable with parameter  $q(p_n)$ , where  $p_n = \sum_{i=1}^N x_n^{(i)} / N$  is the coverage achieved that year. That is, if individuals vaccinate, they are fully protected, otherwise they risk infection with probability  $q(p_n)$ .

**Assumption 7.** At the end of the influenza season of year  $n$ , each individual provides a score between 0 and 1 for their vaccination decision  $x_n^{(i)}$  based on their infection status  $z_n^{(i)}$  and broadly available epidemiological information. We have three cases: (a1) if  $x_n^{(i)} = 0$  and  $z_n^{(i)} = 1$  then the score is 1 and  $v_{n+1}^{(i)} = sv_n^{(i)} + 1$ ; that is, if individual  $i$  did not get vaccinated and got infected, then the individual considers that the vaccination was necessary; (a2) if  $x_n^{(i)} = 0$  and  $z_n^{(i)} = 0$  then the score is 0 and  $v_{n+1}^{(i)} = sv_n^{(i)}$ ; which means that if individual  $i$  did not get vaccinated and did not get infected, then they consider that the vaccination was unnecessary and (b) if  $x_n^{(i)} = 1$ , then the score of the vaccination decision is  $F(p_n)$  and  $v_{n+1}^{(i)} = sv_n^{(i)} + F(p_n)$ . That is, if individual  $i$  got vaccinated then they did not get infected and use the broadcast epidemiological information to evaluate their vaccination decision (see discussion below);

**Assumption 8.** The probability that an individual chooses to get vaccinated is updated as follows

$$w_{n+1}^{(i)} = v_{n+1}^{(i)} / [(1-s^{n+1}) / (1-s)]. \quad (1)$$

That is, an individual's probability to get vaccinated in the next season is given by the updated cumulative vaccination experience. We have normalized  $v_{n+1}^{(i)}$  by  $(1-s^{n+1}) / (1-s)$  because this factor is the maximum possible value for  $v_{n+1}^{(i)}$  if individual  $i$  would have fully benefited from vaccination in all of the  $n$  influenza seasons.

We further introduce general assumptions for the functions  $q(\cdot)$  and  $F(\cdot)$  that result from their biological and sociological meaning. The function  $q(\cdot)$  represents the probability of getting infected versus coverage and must illustrate both a critical coverage and a herd immunity effect (i.e., higher overall coverage must offer higher overall protection). We express this mathematically by the following two assumptions.

**Assumption q1.**  $q: [0, 1] \rightarrow [0, 1]$  is continuous. We also require that  $q(\cdot)$  is differentiable everywhere in the domain except at  $\pi_c$ .

**Assumption q2.**  $q(\pi) = 0$  for  $\pi_c \leq \pi \leq 1$  and  $q'(\pi) < 0$  for  $0 \leq \pi < \pi_c$ , where the prime denotes the derivative with respect to the argument.

We note that the  $q$ -functions obtained from analysis of the Susceptible-Infected-Recovered and Susceptible-Exposed-Infected-Recovered models [17] are compatible with the above assumptions.

A vaccinated individual evaluates their vaccination decision depending on the epidemiological outcome of the influenza season which we express in terms of the vaccination coverage. We make

assumptions on the analytic form of  $F(\cdot)$  to reflect the fact that the individual tries to benefit from herd immunity and that they are not satisfied to have had vaccinated when epidemics were prevented.

**Assumption F1.**  $F: [0, 1] \rightarrow [0, 1]$  is continuous and differentiable everywhere in the domain except at  $\pi = \pi_c$ .

**Assumption F2.**  $F'(\pi) \leq 0$  wherever  $F(\cdot)$  is differentiable. That is, individuals would try to benefit from herd immunity; as coverage increases, the pro-vaccination experience gained by individuals who got vaccinated decreases.

**Assumption F3.**  $F(\pi) < 1$  for  $\pi_c \leq \pi \leq 1$ . That is, individuals are not fully satisfied to have had vaccinated when epidemics were prevented.

The score function  $F(\cdot)$  may be interpreted as the *perceived benefit of vaccination*, normalized between 0 and 1. It depends both on the epidemiological information available to vaccinated individuals and how they react to this information. Such a function could be grounded in terms of how individuals seek to maximize their utility, given their estimates of infection risk. We take the function as a given, and note that Assumptions F1–3 are plausible for any underlying model of self-interested behavior. To address risk-avoiding versus risk-seeking vaccination strategies, we discuss score functions in Sec. that combine distinct pieces of epidemiological information (infection incidence and vaccination coverage) in two different ways.

## Mean-field approximation

We now derive a deterministic approximation for the vaccination coverage dynamics in the limit of a large population (i.e.,  $N \rightarrow \infty$ ). We denote by  $\langle \cdot \rangle$  the average over the realizations of the game and introduce the variable  $\pi_n \equiv \langle p_n \rangle$  for the average coverage over the realizations of the game in the limit of large  $N$ . By the Central Limit Theorem (using the Lyapunov condition), we have that  $p_n = \sum_{i=1}^N x_n^{(i)} / N$  is normally distributed with average  $\pi_n$  and standard deviation  $\sqrt{\sum_{i=1}^N \sigma_n^{(i)2} / N^2}$ , where  $\sigma_n^{(i)}$  is the standard deviation of the distribution of  $x_n^{(i)}$  (i.e.,  $\sigma_n^{(i)2} = w_n^{(i)}(1-w_n^{(i)})$ ). Since  $\sqrt{\sum_{i=1}^N \sigma_n^{(i)2} / N}$  is bounded from above, the dynamics of  $p_n$  at large finite  $N$  can be approximated by adding Gaussian noise with amplitude  $\sim \sqrt{N^{-1}}$  to the dynamics of  $\pi_n$ . However, in most of the phase space of  $\pi$ , the noise will not change the qualitative dynamics of the orbit and mean-field will be a suitable approximation. Furthermore, since the noise amplitude is small and the functions  $q(\cdot)$  and  $F(\cdot)$  are continuous, we have  $\langle q(p) \rangle \approx q(\pi)$  and  $\langle F(p) \rangle \approx F(\pi)$ .

From the definition of  $p_n$ , we immediately obtain  $\pi_n = \sum_{i=1}^N \langle w_n^{(i)} \rangle / N$ . Now, following Assumption 7, it is straightforward to arrive at the equations listed below according to the scoring tree for vaccination decisions

| branch | expected population fraction | expected $v^{(i)}$ update                 |
|--------|------------------------------|-------------------------------------------|
| (a1)   | $(1-\pi_n)q(\pi_n)$          | $v_{n+1}^{(i)} = sv_n^{(i)} + 1$ ;        |
| (a2)   | $(1-\pi_n)[1-q(\pi_n)]$      | $v_{n+1}^{(i)} = sv_n^{(i)}$ ;            |
| (b)    | $\pi_n$                      | $v_{n+1}^{(i)} = sv_n^{(i)} + F(\pi_n)$ . |

The weighted average of Eqs. (2) yields

$$u_{n+1} = su_n + (1-\pi_n)q(\pi_n) + \pi_n F(\pi_n), \quad (3)$$

where  $u$  denotes the average of  $v^{(i)}$  over the entire population. Taking the population average of Eq. (1), we obtain  $\pi_{n+1} = (1-s)u_{n+1} / (1-s^{n+1})$ , which in the limit of  $n \rightarrow \infty$  yields simply

$$\pi_{n+1} = (1-s)u_{n+1}. \quad (4)$$

Combining Eqs. (3) and (4), we obtain a mean-field autonomous approximation of the coverage dynamics of the inductive reasoning game without regard to the individual-level processes

$$\pi_{n+1} = M(\pi_n; s) \equiv s\pi_n + (1-s)[(1-\pi_n)q(\pi_n) + \pi_n F(\pi_n)]. \quad (5)$$

Our dynamical system,  $M(\cdot; s)$ , is defined on the unit interval.

## Epidemiological indicators

It is straightforward to relate epidemiological variables to the framework of the mean-field model. We introduce  $N_n^*$  for the number of susceptible individuals in season  $n$  and  $\rho_n^*(\cdot)$  for its distribution over realizations of the game. The incidence in one influenza season is defined as the number of new cases per susceptible individual. Since we model the number of cases among the susceptible individuals by a binomial distribution with parameter  $q(p_n)$  (Assumption 6) and  $p_n = (N - N_n^*)/N$ , the expected incidence in season  $n$ , denoted by  $\langle I_n \rangle$ , is given by

$$\langle I_n \rangle = \sum_{i=N_n^*}^N \rho_n^*(N_n^*) \frac{q(p_n)N_n^*}{N_n^*} = \langle q(p_n) \rangle \approx q(\pi_n); \quad (6)$$

i.e., the probability that an unvaccinated individual becomes infected. Prevalence is defined as the fraction of cases in the general population. The expected prevalence in season  $n$ , denoted by  $\langle P_n \rangle$ , can be written as

$$\langle P_n \rangle = \sum_{i=N_n^*}^N \rho_n^*(N_n^*) \frac{q(p_n)N_n^*}{N} = \langle (1-p_n)q(p_n) \rangle \approx (1-\pi_n)q(\pi_n). \quad (7)$$

Other epidemiological indicators may be derived in a similar fashion.

## Results

### General results

We first derive three results that apply to all models satisfying Assumptions 1–8, q1–2 and F1–3.

**Proposition 1.** The mean-field model has no attractor included in the  $[\pi_c, 1]$  interval.

**Proof.** In the  $[\pi_c, 1]$  interval, the mean-field model is given by

$$\pi_{n+1} = \pi_n[s + (1-s)F(\pi_n)]. \quad (8)$$

Since  $F(\pi) < 1$  for  $\pi_c \leq \pi \leq 1$  (Assumption F3) we obtain that  $\pi_{n+1} < \pi_n$ . Thus, the  $[\pi_c, 1]$  interval is repelling. An orbit starting in the  $[\pi_c, 1]$  interval decreases monotonically until an iterate belongs to the  $[0, \pi_c]$  interval.

**Remark 1-1.** The  $[\pi_c, 1]$  interval may contain points that belong to an attractor of the mean-field model.

These results have important consequences for public health. They demonstrate that, under very general assumptions, a group of self-interested individuals will not cooperate enough to consistently prevent influenza epidemics through voluntary recurrent vaccinations. Furthermore, if the score function fulfills assumptions F1–3, even a public health program that manages to increase the perceived benefits of vaccination would not eliminate influenza epidemics. However, a public health program may successfully

control the influenza coverage dynamics to achieve more modest goals such as maintaining a high time-average of the coverage and/or a stable coverage. In this study we address the goal of stabilizing the vaccination coverage close to, yet below the critical level. We thus proceed with the fixed-point analysis of the mean-field model given by Eq. (5) in the range where  $\pi < \pi_c$  and epidemics are not prevented.

**Proposition 2.** The fixed point of the mean-field model, denoted by  $\hat{\pi}$ , has the following properties:

1.  $\hat{\pi}$  is the unique solution in the  $(0, \pi_c)$  interval of the equation

$$q(\hat{\pi}) = \frac{\hat{\pi}[1 - F(\hat{\pi})]}{1 - \hat{\pi}} \equiv h(\hat{\pi}), \quad (9)$$

and does not depend on the memory parameter  $s$ .

2. The stability of  $\hat{\pi}$  is given by the condition

$$s > S, \quad \text{where} \quad S \equiv 1 + 2[q'(\hat{\pi})(1 - \hat{\pi}) - q(\hat{\pi})/\hat{\pi} + \hat{\pi}F'(\hat{\pi})]^{-1}; \quad S < 1. \quad (10)$$

Furthermore, assuming that the functions  $q(\cdot)$  and  $F(\cdot)$  are three times differentiable in the  $(0, \pi_c)$  interval,  $\hat{\pi}$  typically loses stability through a period-doubling bifurcation.

### Proof

1. The equation for  $\hat{\pi}$  is immediately obtained by setting the fixed-point condition for Eq. (5); i.e.,  $\pi_{n+1} = \pi_n \equiv \hat{\pi}$ . Using Assumptions F1–3 we immediately have that  $h'(\pi) \geq 0$  in the  $[0, \pi_c]$  interval,  $h(0) = 0$  and  $h(\pi_c) \geq 0$ . Using also Assumptions q1–2, Eq. (9) has a unique solution in the  $(0, \pi_c)$  interval. Given that Eq. (9) is independent of  $s$ ,  $\hat{\pi}$  is independent of  $s$ , as well.
2. Let us denote by  $\lambda$  the derivative of the mean-field map at the fixed point  $\hat{\pi}$ ;  $\lambda$  is given by

$$\lambda = s + (1-s)[q'(\hat{\pi})(1 - \hat{\pi}) - q(\hat{\pi})/\hat{\pi} + \hat{\pi}F'(\hat{\pi})]. \quad (11)$$

The fixed point  $\hat{\pi}$  is linearly stable if and only if  $-1 < \lambda < 1$  (Ref. [23], Chapter 4). Using Eq. (9) to substitute  $F(\hat{\pi})$  and the Assumptions q1–2 and F1–3, we obtain straightforwardly that  $\lambda < 1$  is always satisfied and the condition  $-1 < \lambda$  can be written in the form of the Eq. (10). Note that  $S < 1$  since the square bracket in the definition of  $S$  is strictly negative. Thus, the fixed point  $\hat{\pi}$  always has a nonempty domain of stability in the parameter space,  $[S, 1] \cap [0, 1] \neq \emptyset$ . The fixed point  $\hat{\pi}$  may only lose stability as  $s$  decreases below  $S$ ; i.e.,  $\lambda$  decreases below minus one. With the additional requirements

$$\left. \frac{\partial^2 M(\pi; s)}{\partial s \partial \pi} \right|_{(\hat{\pi}, S)} \neq 0, \quad (12)$$

$$\left. \frac{1}{2} \frac{\partial^2 M(\pi; s)}{\partial \pi^2} \right|_{(\hat{\pi}, S)} + \left. \frac{1}{3} \frac{\partial^3 M(\pi; s)}{\partial \pi^3} \right|_{(\hat{\pi}, S)} \neq 0, \quad (13)$$

the dynamical system  $M(\cdot; s)$  satisfies the conditions for having a generic period-doubling bifurcation at  $(\hat{\pi}; S)$  – Ref. [23], Chapter 4, Theorem 4.3 and Ref. [24], Chapter 2.3. Other bifurcations are possible, depending on the particular choices for the functions  $q(\cdot)$  and  $F(\cdot)$ . However, they are not

generic. In other words, a smooth arbitrary small perturbation of these functions will break the bifurcation into generic ones that survive such perturbations. Equation (12) can be rewritten as

$$[1 - F(\hat{\pi})] - \hat{\pi}F'(\hat{\pi}) + q(\hat{\pi}) - (1 - \hat{\pi})q'(\hat{\pi}) \neq 0, \quad (14)$$

and is always satisfied virtue of Assumptions F1–3 and the fact that  $\hat{\pi} \in (0, \pi_c)$ . Equation (13) requires that the functions  $q(\cdot)$  and  $F(\cdot)$  are three times differentiable in the  $(0, \pi_c)$  interval and is typically satisfied; i.e., if violated, a smooth arbitrary small perturbation of these functions will have Eq. (13) satisfied.

We note that the period doubling bifurcation can be either *direct* or *inverse* (Ref. [24], Chapter 2.3). In the case of a direct bifurcation, the fixed point  $\hat{\pi}$  loses stability at  $s = S$  and, simultaneously, a period-two attractor is created. In the vicinity of the bifurcation, the period-two orbit is symmetric about  $\hat{\pi}$ , having one iterate above and one below the fixed point. Hence, mild and severe influenza epidemics alternate. We consider this scenario to be an inferior outcome since the health care system has to manage more severe epidemics while the average coverage remains the same. In the case of an inverse bifurcation, the stable fixed point  $\hat{\pi}$  merges with an unstable period-two orbit and loses stability at  $s = S$ . Past bifurcation, the local dynamical structure consists of the unstable fixed point  $\hat{\pi}$  without any attractor in the neighborhood. Hence, an orbit in this region will evolve to some distant attractor. A class of such attractors is created through codimension-one border-collision bifurcations. Due to the discontinuity of the model derivative at  $\pi_c$ , critical periodic orbits with points in the  $[\pi_c, 1]$  interval are created at particular values of  $s$ . Denoting the  $k$ th iterate of the model map by  $M^{[k]}(\cdot; s)$ , the equation of a period- $k$  critical orbit is  $M^{[k]}(\pi_c; s) = \pi_c$ . The critical periodic orbit may turn into a noise-robust attractor having at least one point in the  $(\pi_c, 1]$  interval; see also discussion in Ref. [18]. If the fixed point  $\hat{\pi}$  loses stability through an inverse period doubling bifurcation and is captured by such an attractor, then complex coverage dynamics ensue where influenza epidemics are occasionally prevented.

Finally, we present a variational result that links changes in the score function to changes in the stationary coverage.

**Proposition 3.** Let  $\delta F : [0, 1] \rightarrow [0, 1]$  be an infinitesimal deformation of  $F(\cdot)$  such that the function  $F(\cdot) + \delta F(\cdot)$  satisfies Assumptions F1–3. If the function  $F(\cdot)$  is perturbed by the amount  $\delta F(\cdot)$ , then the fixed point  $\hat{\pi}$  is perturbed by an amount  $\delta \hat{\pi}$  having the same sign as  $\delta F(\hat{\pi})$ .

**Proof.** Applying Eq. (9) for the functions  $F(\cdot)$  and  $F(\cdot) + \delta F(\cdot)$ , and subtracting, we obtain in the first infinitesimal order

$$\delta F(\hat{\pi}) = \delta \hat{\pi}[-q'(\hat{\pi})(1 - \hat{\pi})/\hat{\pi} + q(\hat{\pi})/\hat{\pi}^2]. \quad (15)$$

According to Assumptions q1–2, the factor in the square bracket of Eq. (15) is positive.

**Remark 3-1.** The above result can be immediately generalized for finite deformations of  $F(\cdot)$  that are performed through sequential infinitesimal steps.

**Remark 3-2.** Stability of the fixed point  $\hat{\pi}$  may be lost due to deformations because the stability condition (10) depends on  $F'(\hat{\pi})$ .

The above results show that the stable vaccination coverage follows the trend of the perceived benefit of vaccination (i.e., score function  $F(\cdot)$ ). Providing more epidemiological information to the public may cause either an increase or a decrease in the perceived benefit of vaccination, as we show by analyzing two different strategies. Risk-avoiding individuals may use the additional

information to avoid infection risk and increase the value of their score function. In contrast, risk-seeking individuals may perceive a lower benefit to vaccination and attempt even more to free-ride on herd immunity. Hence, broadcasting additional epidemiological information may result in either increasing or decreasing the stable vaccination coverage.

## Model examples

To illustrate the results expressed by Propositions 1–3, we discuss and compare five models. We use subscripts 1–3, 4a, 4b to refer to the dynamical elements corresponding to the models 1–3, 4a, 4b, respectively. In each case, we assume that individuals know, at the end of every influenza season, whether an epidemic took place. In particular, for model 1, we assume that this is the only information available, determining a certain form for the function  $F(\cdot)$ . In fact, model 1 is only a slight generalization of the *basic* model previously studied [17,18] and serves as reference. For the models 2, 3, 4a and 4b we assume that individuals are given additional epidemiological information that determine other functional forms for  $F(\cdot)$ , in each case. For the time being, we leave the function  $q(\cdot)$  unspecified. Later we discuss a choice of function for  $q(\cdot)$  and present numerical results.

### Model 1

In this model, at the end of each influenza season, individuals know only whether there was an epidemic and vaccinated individuals consider vaccination to have been worthwhile only if there was an epidemic. The  $F$ -function is given by [18]

$$F_1(\pi) = 1 - \theta(\pi - \pi_c), \quad (16)$$

where  $\theta(\cdot)$  is the unit step function defined as

$$\theta(x) = \begin{cases} 1, & \text{if } x \geq 0; \\ 0, & \text{if } x < 0. \end{cases} \quad (17)$$

In Ref. [18],  $q(\cdot)$  is a piecewise linear function. However, to recover the qualitative features of the dynamics, it is sufficient that  $q(\cdot)$  satisfies Assumptions q1–2. Performing a similar analysis, we immediately obtain that there are no fixed points and  $\pi_c$  may be attracting only from the left. The coverage dynamics around  $\pi_c$  proceeds in a cyclic fashion. When the coverage is less than  $\pi_c$ , individuals become infected and they increase their probability of getting vaccinated in the next influenza season. The vaccination coverage gradually approaches  $\pi_c$ , until it eventually slightly exceeds the critical level due to the stochastic nature of the individual-level adaptive decision-making process. At this point, an influenza epidemic does not occur. However, in the following season, many individuals decide not to get vaccinated, as an epidemic did not occur in the previous season; thus vaccination coverage abruptly decreases in the vicinity of  $s\pi_c$  and a severe epidemic ensues. Then, the vaccination coverage repeats in a similar cyclic dynamic. In technical terms, the mean-field dynamics approaching  $\pi_c$  is not robust to noise. Once the coverage slightly exceeds  $\pi_c$  due to noise, the next iterate of the coverage drops in the vicinity of  $s\pi_c$  and a severe epidemic occurs [18]. This model is not generic since an infinitesimal perturbation of  $F(\cdot)$  may shift the attractor away from the boundary, destroying the sensitivity to noise. However, the biological and sociological considerations leading to the particular form of the function  $F(\cdot)$  are natural. Consequently, the model may be considered representative for this application. A similar situation occurs for models of disease transmission based on ordinary differential

equations. Although the transcritical bifurcation that models the epidemic threshold is not generic, it is considered representative assuming no migration of infected individuals.

Stable, noise-robust, fixed-point dynamics prevent the severe epidemics found in model 1, if and only if  $\hat{\pi}$ , the fixed point of the model under consideration, satisfies the condition

$$\hat{\pi} > s\pi_c. \quad (18)$$

Combining this relation with the stability condition (10) we obtain that the fixed-point dynamics of the vaccination coverage prevent the severe epidemics in model 1 if and only if  $S < \hat{\pi}/\pi_c$ . Furthermore, the memory parameter  $s$  must belong to the following interval

$$s \in (S, \hat{\pi}/\pi_c) \equiv \mathcal{S}. \quad (19)$$

### Model 2

We consider that, at the end of every influenza season, the individuals know the incidence of infection that was realized in that season. This implies that they also know whether there was an epidemic: if the incidence was larger than zero then there was an epidemic; otherwise there was not. If they got vaccinated, then individuals use the epidemiological information to evaluate their vaccination decisions. In particular, we assume that the score of their last vaccination decision equals the seasonal incidence which also represents the individual-level risk of becoming infected if unvaccinated; see Eq. (6)

$$F_2(\pi) = q(\pi). \quad (20)$$

We note that other models are possible. For example, *more concerned* individuals may use a score function that increases faster with the incidence; e.g.,  $F_2(\pi) = q(\pi)^\beta$ , where  $0 < \beta < 1$ . Here we choose  $\beta = 1$  for analytical tractability. Hence, the fixed point equation (9) becomes

$$q(\hat{\pi}_2) = \hat{\pi}_2 \equiv h_2(\hat{\pi}_2). \quad (21)$$

In this case,  $\hat{\pi}_2 < \pi_c$  (see Fig. 1) and noise-robust equilibrium dynamics of the coverage is possible. The stability bound for  $s$  is

$$S_2 = 1 - 2/[1 - q'(\hat{\pi}_2)]. \quad (22)$$

### Model 3

In this case we assume that, at the end of each influenza season, the vaccination coverage is disclosed to the public. Additionally, we assume that individuals know whether there was an epidemic. An  $F$ -function that summarizes this facts is

$$F_3(\pi) = (1 - \pi)[1 - \theta(\pi - \pi_c)]. \quad (23)$$

If the epidemic was prevented, then the individuals that got vaccinated evaluate their last vaccination as unnecessary; i.e.,  $F_3(\pi) = 0$ , if  $\pi \geq \pi_c$ . Otherwise, they evaluate their last vaccination as necessary to the degree that their peers did not get vaccinated;  $F_3(\pi) = 1 - \pi$ , if  $\pi < \pi_c$ . These simple assumptions yield in fact a score function  $F_3(\cdot)$  that is discontinuous at  $\pi_c$  and violates Assumption F1; see Eq. (23). Hence, the mean-field approximation of the inductive reasoning game fails for coverage dynamics in the vicinity of  $\pi_c$ . However, the fixed point equation (9) is

$$q(\hat{\pi}_3) = \hat{\pi}_3^2 / (1 - \hat{\pi}_3) \equiv h_3(\hat{\pi}_3), \quad (24)$$

and  $\hat{\pi}_3 < \pi_c$  (see Fig. 1). Therefore, the fixed point dynamics of the one-dimensional map does approximate that of the inductive reasoning game. Noise-robust equilibrium dynamics of the coverage is possible. The stability bound for  $s$  is

$$S_3 = 1 - 2/[-q'(\hat{\pi}_3)(1 - \hat{\pi}_3) + q(\hat{\pi}_3)/\hat{\pi}_3 + \hat{\pi}_3]. \quad (25)$$

### Model 4a

Finally, we discuss the case where both incidence and coverage are disclosed to the public. First, we assume that the individuals are avoiding risk of infection by increasing their vaccination scores.

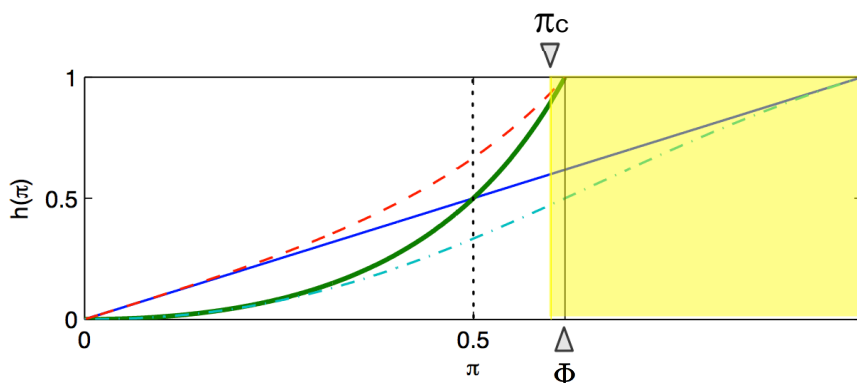

**Figure 1. Representation of the possible fixed point equations for the example models.** For illustration, we consider  $\pi_c = 0.6$  [17,18]. We assume that  $q(\pi) = 0$  in the shaded region (i.e., where  $\pi \geq \pi_c$ ) and that  $q(\cdot)$  is larger than zero and strictly decreasing in the complementary region. Model 1 has an attractor from the left at  $\pi_c$ . For models 2, 3, 4a and 4b, the functions  $h_{2,3,4a,4b}(\pi)$  are represented with thin violet continuous, thick green continuous, cyan dot-dashed and red dashed lines, respectively. Note that  $h_2(\cdot)$  and  $h_3(\cdot)$  intersect at  $(1/2, 1/2)$ ,  $h_2(\cdot)$  and  $h_{4a}(\cdot)$  intersect at  $(1, 1)$ , and  $h_3(\cdot)$  and  $h_{4b}(\cdot)$  intersect at  $(\Phi, 1)$ , where  $\Phi$  is the golden ratio conjugate. The function  $h_{4a}(\cdot)$  is smaller than  $h_{2,3}(\cdot)$  in the unit interval; thus,  $\hat{\pi}_{2,3} < \hat{\pi}_{4a}$ . When restricted to the unit square,  $h_{4b}(\cdot)$  is larger than  $h_{2,3}(\cdot)$ ; thus,  $\hat{\pi}_{4b} < \hat{\pi}_{2,3}$ . doi:10.1371/journal.pone.0028300.g001

In particular, we assume that vaccinated individuals acknowledge a posteriori the benefit of their last vaccination not only for eliminating their personal risk of infection  $q(\pi)$  but also for contributing to the proportion of successful free-riders  $(1-\pi)[1-q(\pi)]$ . We consider the following scoring function

$$F_{4a}(\pi) = \{q(\pi) + (1-\pi)[1-q(\pi)]\}[1-\theta(\pi-\pi_c)] \\ = 1 - [1-F_2(\pi)][1-F_3(\pi)]. \quad (26)$$

Note that  $F_{2,3}(\pi) \leq F_{4a}(\pi), \forall \pi \in [0,1]$ . The function  $F_{4a}(\cdot)$  is discontinuous at  $\pi = \pi_c$ ; model 4a is subject to the same caveat as model 3 regarding the dynamics in the vicinity of  $\pi_c$ . The fixed point equation (9) becomes

$$q(\hat{\pi}_{4a}) = \hat{\pi}_{4a}^2 / (1 - \hat{\pi}_{4a} + \hat{\pi}_{4a}^2) \equiv h_{4a}(\hat{\pi}_{4a}). \quad (27)$$

Noise-robust equilibrium dynamics of the coverage is possible since  $\hat{\pi}_{4a} < \pi_c$  (see Fig. 1). The stability bound for  $s$  is

$$S_{4a} = 1 - 2 / [-q'(\hat{\pi}_{4a})(1 - \hat{\pi}_{4a} + \hat{\pi}_{4a}^2) + q(\hat{\pi}_{4a}) \\ (\hat{\pi}_{4a} - 1/\hat{\pi}_{4a}) - \hat{\pi}_{4a}]. \quad (28)$$

### Model 4b

In this model, as well, incidence and coverage are disclosed to the public. We assume that the individuals are risk-seeking in their attempt to ride on herd immunity. If they got vaccinated, they evaluate their last vaccination necessary only to the degree that their peers got infected, using a scoring function that equals the prevalence

$$F_{4b}(\pi) = (1-\pi)q(\pi) = F_2(\pi)F_3(\pi). \quad (29)$$

$F_{4b}(\cdot)$  may also be considered reasonable for the case where just the prevalence of infection is broadcast. Note that  $F_{4b}(\pi) \leq F_{2,3}(\pi), \forall \pi \in [0,1]$ . The fixed point equation (9) becomes

$$q(\hat{\pi}_{4b}) = \hat{\pi}_{4b} / (1 - \hat{\pi}_{4b}^2) \equiv h_{4b}(\hat{\pi}_{4b}). \quad (30)$$

Once again, noise-robust equilibrium dynamics of the coverage is possible since  $\hat{\pi}_{4b} < \pi_c$  (see Fig. 1). The stability bound for  $s$  is

$$S_{4b} = 1 - 2 / [-q'(\hat{\pi}_{4b})(1 - \hat{\pi}_{4b}^2) + q(\hat{\pi}_{4b})(\hat{\pi}_{4b} + 1/\hat{\pi}_{4b})]. \quad (31)$$

In Fig. 1, we illustrate the functions  $h_{2,3,4a,4b}(\pi)$  and compare all the models presented above. The relevant domain is the unit square; i.e.,  $0 \leq \pi \leq 1$  and  $0 \leq h(\pi) \leq 1$ . It is straightforward to show that

1.  $h_{3,4b}(\pi) > 1, \forall \pi \in (\Phi, 1]$ , where  $\Phi$  is the golden ratio conjugate;
2.  $h_{2,3}(\pi) \geq h_{4a}(\pi), \forall \pi \in [0,1]$ , thus  $\hat{\pi}_{2,3} < \hat{\pi}_{4a}$ ;
3.  $h_{4b}(\pi) \geq h_{2,3}(\pi), \forall \pi \in [0, \Phi]$ , thus  $\hat{\pi}_{4b} < \hat{\pi}_{2,3}$ .

Thus, among all the models we considered, the ones where individuals know most about influenza epidemiology (i.e., models 4a and 4b) yield the highest and the lowest value for the fixed point of the voluntary vaccination coverage. A comparison between  $\hat{\pi}_2$  and  $\hat{\pi}_3$  awaits a particular choice for the function  $q(\cdot)$ .

### Numerics

For a numerical comparison, we have chosen the  $q$ -function below [17,18]

$$q(\pi) = q(0)(1 - \pi/\pi_c)\theta(\pi_c - \pi). \quad (32)$$

We do not present numerics for model 1 since they have been extensively studied [17,18]. Figure 2 presents maps and bifurcation diagrams for the other four models where we have chosen  $\pi_c = 0.6$  and  $q(0) = 0.8$ , as in Refs. [17,18]. Each column of panels

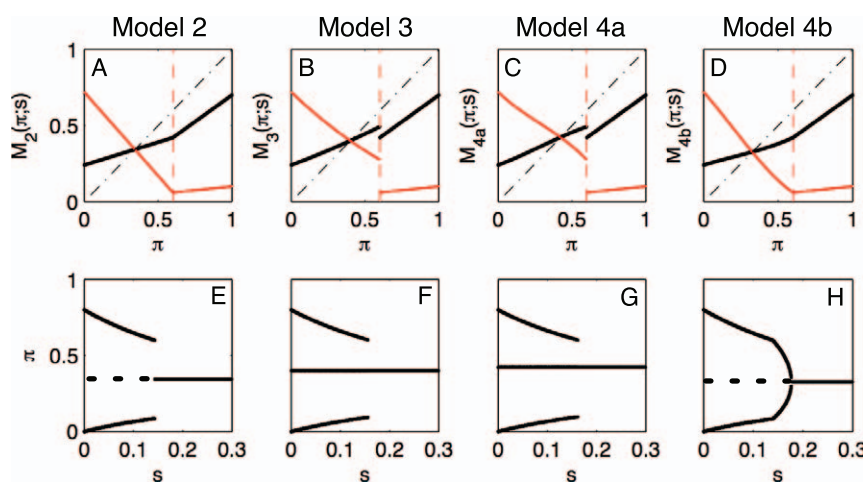

**Figure 2. Maps and bifurcation diagrams for the example models 2, 3 and 4a and 4b with the  $q$ -function given by Eq. (32) having  $\pi_c = 0.6$  and  $q(0) = 0.8$  [17,18].** Panels A and E refer to model 2; panels B and F refer to model 3; panels C and G refer to model 4a; and panels D and H refer to model 4b. Panels A–D represent the model maps  $M_{2,3,4a,4b}(\pi; 0.7)$  (thick black line) and  $M_{2,3,4a,4b}(\pi; 0.1)$  (thick red line) versus  $\pi$ , respectively; the thin dot-dashed black line bisects the first quadrant and dashed red vertical line marks  $\pi = \pi_c$ . Panels E–H represent bifurcation diagrams of the maps  $M_{2,3,4a,4b}(\cdot; s)$  versus  $s$ , respectively. Continuous lines show how attractors change versus  $s$  while dashed lines show how unstable fixed points change versus  $s$ . doi:10.1371/journal.pone.0028300.g002



corresponds to one model: the first column (i.e., panels A and E) corresponds to model 2, the second column (i.e., panels B and F) corresponds to model 3, the third column (i.e., panels C and G) corresponds to model 4a, and the fourth column (i.e., panels D and H) corresponds to model 4b. Panels A–D represent the model maps  $M_{2,3,4a,4b}(\pi; 0.7)$  (thick black line) and  $M_{2,3,4a,4b}(\pi; 0.1)$  (thick red line) versus  $\pi$ , respectively. Panels D–H represent bifurcation diagrams of the maps  $M_{2,3,4a,4b}(\cdot; s)$  versus  $s$ , respectively. Several comments are in order.

1. The fixed points  $\hat{\pi}_{2,3,4a,4b}$  are less than  $\pi_c$  (Fig. 2A–D) and remain constant for changing values of  $s$  (Fig. 2E–H).
2. The bifurcation structure of  $M_2(\cdot; s)$  is not generic because  $M_2(\cdot; s)$  is not generic. In fact, since  $q(\pi)$  is piecewise linear,  $M_2(\cdot; s)$  is piecewise linear, as well (Fig. 2A). The fixed point  $\hat{\pi}_2$  does not undergo a generic period doubling bifurcation (Proposition 2) because a period two critical orbit becomes an attractor at the same parameter value where  $\hat{\pi}_2$  loses stability,  $S_2 = [q(0)/\pi_c - 1]/[q(0)/\pi_c + 1]$  (Fig. 2E). This bifurcation structure does not survive smooth arbitrary small perturbations (Proposition 2).
3. The fixed points  $\hat{\pi}_3$  and  $\hat{\pi}_{4a}$  do not lose stability for  $s \in [0, 1]$  because  $S_3$  and  $S_{4a}$  are negative.
4. The fixed point  $\hat{\pi}_{4b}$  loses stability through a direct period doubling bifurcation.
5. The relations  $\hat{\pi}_{4a} > \hat{\pi}_{2,3}$  and  $\hat{\pi}_{2,3} > \hat{\pi}_{4b}$  hold, as expected from the general theory.
6. Although  $\hat{\pi}_2 < \hat{\pi}_3$ , this is not generally true; it is due to the fact that  $q(\cdot)$  is piecewise linear; see Fig. 1.

Figure 3 presents numerical results for the parameter space  $\{(\pi_c, q(0)); \pi_c \in [0, 1], q(0) \in [0, 1]\}$ . Many features in Fig. 3 can be addressed analytically; we leave the details to the reader. As in

Fig. 2, each column of panels corresponds to one model: the first column (i.e., panels A, E, and I) corresponds to model 2, the second column (i.e., panels B, F, J) corresponds to model 3, the third column (i.e., panels C, G and K) corresponds to model 4a, and the fourth column (i.e., panels D, H and L) corresponds to model 4b. Panels A–D show how far the fixed point of each model (i.e.,  $\hat{\pi}_{2,3,4a,4b}$ ) is from the critical vaccination coverage  $\pi_c$ . We note that  $\pi_{4a}$  is closest to  $\pi_c$ ,  $\pi_{3,2}$  come next (in order) and  $\pi_{4b}$  last. Panels E–H plot colormaps for the lower bounds of the intervals of  $s$  such that  $\hat{\pi}_{2,3,4a,4b}$  are stable (denoted by  $S_{2,3,4a,4b}$ ), respectively. We remark that  $S_{4a} < S_3 < S_2 < S_{4b}$ ; therefore the stability interval is largest for model 4a, then model 3, model 2 and last, model 4b. Finally, panels I–L represent how the sizes of the intervals  $S_{2,3,4a,4b}$  vary with  $\pi_c$  and  $q(0)$ , respectively. We notice that  $S_{4a}$  is the largest across all of the domain, followed (in order) by  $S_3$ ,  $S_2$  and  $S_{4b}$ .

A model describing a convenient scenario would have the fixed point coverage close to the critical level, a low value of  $S$  so fixed point stability is achieved even though individuals do not remember many past vaccination outcomes, and a broad  $S$ -interval for model robustness. Among the models presented here, model 4a performs best, then model 3, model 2 and last model 4b.

## Discussion

Field studies provide evidence of free-riding on influenza herd immunity. For example, “self-other” optimistic bias about influenza risk was demonstrated in a sample of New Jersey adults where three out of four individuals estimated their risk of infection below average [27]. Using game theory, it was previously shown that, in the case where individuals know only whether an epidemic takes place every influenza season, free-riding on herd immunity may cause severe drops in the vaccination coverage, leading to major epidemics [17,18]. Furthermore, these major epidemics could be suppressed by a public health program offering free vaccination

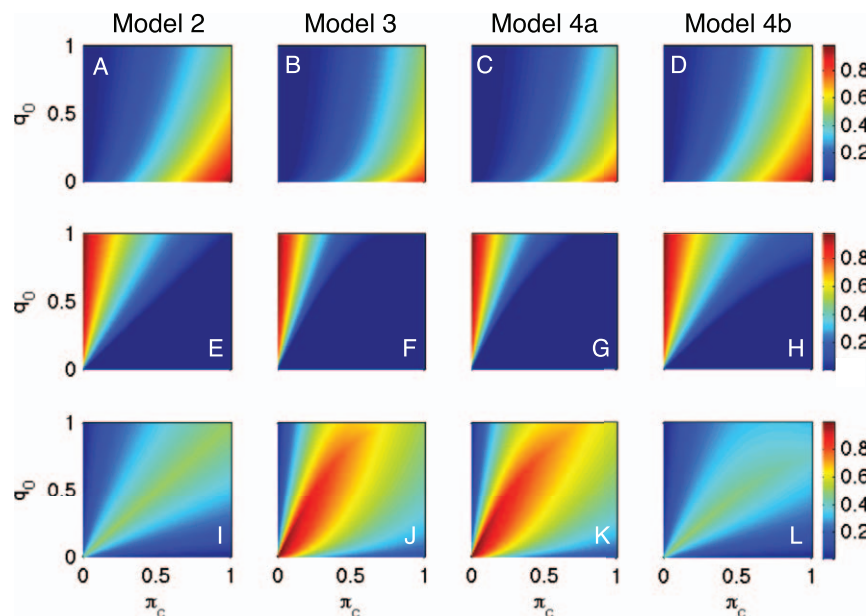

**Figure 3. Numerical comparison between the fixed point structure of the example models 2, 3, 4a and 4b with the choice of  $q$ -function given by Eq. (32).** We explored the parameter space  $\{(\pi_c, q(0)); \pi_c \in [0, 1], q(0) \in [0, 1]\}$ . Panels A, E and I refer to model 2; panels B, F and J refer to model 3; panels C, G and K refer to model 4a; and panels D, H and L refer to model 4b. Panels A–D represent how far is the fixed point of each model from the critical vaccination coverage; i.e.,  $|\hat{\pi}_{2,3,4a,4b} - \pi_c|$ , respectively. Panels E–H represent the lower bound of the memory parameter  $s$  such that the fixed point of the corresponding model is stable; i.e.,  $S_{2,3,4a,4b}$ , respectively. Panels I–L represent the width of the  $s$ -interval where the fixed point dynamics has coverage above  $s\pi_c$ ; i.e.,  $(\hat{\pi}_{2,3,4a,4b}/\pi_c - S_{2,3,4a,4b})$ , respectively.  
doi:10.1371/journal.pone.0028300.g003



for a number of years to every individual, every time the individual decided to get vaccinated [17]. However, other means of epidemic control may be investigated. In a society where vaccines are rarely in short supply, the success of voluntary vaccination programs depends very much on the perceived benefit of vaccination. Mass media is an important factor in shaping social trends and its reach has never been broader. In this work we investigated the potential impact of epidemiological newscasts on the dynamics of voluntary vaccination coverage against seasonal influenza infections.

Our first result addresses the possibility of eliminating influenza epidemics by increasing the vaccination coverage. Recently, the seasonal influenza vaccination coverage has steadily increased in the developed world. The average in five European countries reached 25.9% in 2007–2008 [25], while in the US the coverage reached 41.1% in 2009–2010 [26]. Still, these figures fall short of the critical vaccination coverage, estimated to be in the range of 50–70%; see [17] and references therein. Will the vaccination trend continue such that the coverage exceeds the critical level year after year, eliminating influenza epidemics? The answer is most likely no. If the coverage approached the critical value, epidemic severity would decline and individuals would no longer perceive the same benefit in vaccination, instead attempting to free-ride on herd immunity. Hence, epidemics would persist. Furthermore, our study suggests that mass media would not be able to change this course of events, no matter what epidemiological information were released to the public to change its perceived benefit of vaccination (Proposition 1).

Our second result shows that newscasts providing the individuals with more epidemiological information (e.g., incidence, coverage, or both) may lead to a stable coverage dynamics, suppressing severe epidemics caused by free-riding of herd immunity (Proposition 2). Hence, mass media could effectively be used for public health just as incentives providing free vaccination [17]. The practical implications of this result may be profound as newscasts require no compliance from participants and less logistics than implementation of vaccination incentives.

Our third and last result states that the stabilized level of the vaccination coverage follows the trend of the perceived vaccination benefits (Proposition 3). Still, as they learn more about seasonal influenza epidemiology, individuals have two major choices in changing their vaccination strategies. First, they may assign more utility to vaccination, increasing the overall vaccination coverage. Second, they may take even more risk to free-ride on herd immunity, causing a decrease in the

vaccination coverage. Which of these two choices would likely be realized is a difficult question. Using reasonable assumptions, our example models and numerics show that the vaccination coverage in the general population could become better or worse when disclosing both vaccination coverage and disease incidence than when disclosing either piece of information separately.

A significant body of literature in cognitive psychology addresses perception biases of clinical risk (see Refs. [27–29] and references therein); however, applications to influenza are limited. Data to characterize the public perception of the benefits of vaccination and its potential trends when epidemiological information is broadcast are currently insufficient. A comprehensive study [25] of seasonal influenza vaccination in the general population was conducted in five European countries over seven influenza seasons, identifying reasons invoked pro and contra vaccination. The chief reasons invoked for getting vaccinated were advice from a family doctor (58.6%) and the perception of influenza as a serious illness (51.9%). The two major reasons for not getting vaccinated were the feeling of not being likely to catch influenza (39.5%) and never having considered the option of being vaccinated (35.8%). More field investigations are needed to explicate these reasons in terms of epidemic variables (e.g., prevalence, coverage, etc.) and build realistic models for the score function  $F(\cdot)$ . Still, to provide a broad understanding of possible modeling outcomes, here we investigated several examples of how mass media may influence individuals' perceptions of the benefits of vaccination, by reporting infection incidence and vaccination coverage. We note that game theory was particularly suited for our study as it explicitly models risk taking, adaptability and decision making.

In conclusion, the impact of mass-media on social behavior and, implicitly, vaccination coverage is complex. Our game theoretic approach allows for illuminating some of the underlying mechanisms, proposing new perspectives for public health.

## Acknowledgments

We thank Virginie Supervie for discussions during the course of this research. We also thank an anonymous reviewer for constructive comments and suggestions.

## Author Contributions

Wrote the paper: RB. Designed the research: RB. Performed the analytical and the numerical analyses: RB.

## References

1. Thomas EA, Goldstone SE (2011) Should I or shouldn't I: Decision making, knowledge and behavioral effects of quadrivalent HPV vaccination in men who have sex with men. *Vaccine* 29: 570–6.
2. Hackett AJ (2008) Risk, its perception and the media: The MMR controversy. *Community Pract* 81: 22–5.
3. Brown KF, Kroll JS, Hudson MJ, Ramsay M, Green J, et al. (2010) Factors underlying parental decisions about combination childhood vaccinations including MMR: A systematic review. *Vaccine* 28: 4235–48.
4. Samba E, Nkrumah F, Leke R (2004) Getting polio eradication back on track in Nigeria. *N Engl J Med* 350: 645–6.
5. Myers LB, Goodwin R (2011) Determinants of adults' intention to vaccinate against pandemic swine flu. *BMC Public Health* 11: 15.
6. Fabry P, Gagneur A, Pasquier JC (2011) Determinants of A (H1N1) vaccination: Cross-sectional study in a population of pregnant women in Quebec. *Vaccine* 29: 1824–9.
7. Liu R, Wu J, Zhu H (2007) Media/psychological impact on multiple outbreaks of emerging infectious diseases. *Comput Math Method M* 8: 153–64.
8. Cui J, Sun Y, Zhu H (2008) The impact of media on the control of infectious diseases. *J Dyn Differ Equ* 20: 31–53.
9. Li Y, Cui J (2009) The effect of constant and pulse vaccination on SIS epidemic models incorporating media coverage. *Commun Nonlinear Sci* 14: 2353–65.
10. Tchuente J, Dube N, Bhunu C (2011) The impact of media coverage on the transmission dynamics of human influenza. *BMC Public Health* 11: S5.
11. Bauch CT, Galvani A, Earn DJ (2003) Group interest versus self-interest in smallpox vaccination policy. *Proc Natl Acad Sci U S A* 100: 10564–7.
12. Bauch CT, Earn DJ (2004) Vaccination and the theory of games. *Proc Natl Acad Sci U S A* 101: 13391–4.
13. Manfredi P, Posta PD, d'Onofrio A, Salinelli E, Centrone F, et al. (2009) Optimal vaccination choice, vaccination games, and rational exemption: An appraisal. *Vaccine* 28: 98–109.
14. Fu F, Rosenbloom DI, Wang L, Nowak MA (2011) Imitation dynamics of vaccination behaviour on social networks. *Proc Biol Sci* 278: 42–9.
15. Arthur WB (1994) Inductive reasoning and bounded rationality. *Am Econ Rev* 84: 406–11.
16. Challet D, Marsili M, Zhang YC (2005) *Minority games*. Oxford University Press; New York.
17. Vardavas R, Breban R, Blower S (2007) Can influenza epidemics be prevented by voluntary vaccination? *PLoS Comput Biol* 3: e85.

18. Breban R, Vardavas R, Blower S (2007) Mean-field analysis of an inductive reasoning game: Application to influenza vaccination. *Phys Rev E Stat Nonlin Soft Matter Phys* 76: 031127.
19. Cornforth D, Reluga T, Shim E, Bauch CT, Galvani AP, et al. (2011) Erratic flu vaccination emerges from short-sighted behavior in contact networks. *PLoS Comput Biol* 7: e1001062.
20. Ferguson NM, Cummings DA, Cauchemez S, Fraser C, Riley S, et al. (2005) Strategies for containing an emerging influenza pandemic in southeast Asia. *Nature* 437: 209–14.
21. Cooper BS, Pitman RJ, Edmunds WJ, Gay NJ (2006) Delaying the international spread of pandemic influenza. *PLoS Med* 3: e212.
22. Halloran ME, Longini IM (2006) Community studies for vaccinating schoolchildren against influenza. *Science* 311: 615–6.
23. Kuznetsov YA (2004) Elements of applied bifurcation theory. Springer-Verlag; New York.
24. Ott E (2002) Chaos in dynamical systems. Cambridge University Press; Cambridge.
25. Blank P, Schwenkglens M, Szucs T (2009) Disparities in influenza vaccination coverage rates by target group in five European countries: Trends over seven consecutive seasons. *Infection* 37: 390–400.
26. CDC (2011) Influenza vaccination coverage. URL <http://www.cdc.gov/flu/professionals/vaccination>.
27. Weinstein ND (1989) Optimistic biases about personal risks. *Science* 246: 1232.
28. Lloyd AJ (2001) The extent of patients' understanding of the risk of treatments. *Quality in Health Care* 10: i14–8.
29. Thomson R, Edwards A, Grey J (2005) Risk communication in the clinical consultation. *Clinical Medicine* 5: 465–9.
